# Supplementary material for: Deep sequencing reveals the eight facets of the influenza A/HongKong/1/1968 (H3N2) virus cap-snatching process
Source: PubMed Central journal article supplement — Sci Rep. 2014 Aug 26;4:6181. doi: 10.1038/srep06181 (PMC4143772; doi:10.1038/srep06181), 2014-08-26
Supplement: srep06181-s1.pdf [file srep06181-s1.pdf]

**Deep sequencing reveals the eight facets of the influenza A/HongKong/1/1968  
(H3N2) virus cap-snatching process.**

Dorota Sikora\*, Lynda Rocheleau\*, Earl G. Brown and Martin Pelchat<sup>1</sup>

Department of Biochemistry, Microbiology and Immunology, Faculty of Medicine,  
University of Ottawa, Ottawa, Ontario, K1H 8M5, Canada.

\* These authors contributed equally to this work.

<sup>1</sup>Corresponding author: Phone: (613) 562-5800 ext. 8846

Fax: (613) 562-5452

E-mail: [mpelchat@uottawa.ca](mailto:mpelchat@uottawa.ca)

**Table S1:** Relative numbers of each nucleotide present at the 5' ends of viral mRNAs obtained from infected A549 cells. The nucleotide positions (-15 to 7) are numbered according to the host/virus junction (vertical line), defined as the phosphodiester bond located upstream of position G2 on IAV mRNA.

| IAV mRNA   | Nucleotide position |        |        |         |         |         |         |         |         |         |         |         |         |         |         |  |         |         |         |         |         |         |    |
|------------|---------------------|--------|--------|---------|---------|---------|---------|---------|---------|---------|---------|---------|---------|---------|---------|--|---------|---------|---------|---------|---------|---------|----|
|            | -15                 | -14    | -13    | -12     | -11     | -10     | -9      | -8      | -7      | -6      | -5      | -4      | -3      | -2      | -1      |  | 2       | 3       | 4       | 5       | 6       | 7       |    |
| <b>PB2</b> |                     |        |        |         |         |         |         |         |         |         |         |         |         |         |         |  |         |         |         |         |         |         |    |
| A          | 13625               | 88000  | 121718 | 452994  | 849610  | 1064018 | 582189  | 593672  | 476726  | 569818  | 475635  | 449721  | 536516  | 849081  | 630008  |  | 2823    | 410     | 1171    | 3064484 | 3057845 | 3062793 |    |
| C          | 31                  | 6285   | 114269 | 172368  | 484324  | 444930  | 680283  | 719954  | 782091  | 845340  | 955219  | 663750  | 922677  | 813331  | 936907  |  | 486     | 3063577 | 1761    | 89      | 2606    | 1286    |    |
| G          | 6250                | 16153  | 98065  | 301677  | 481185  | 752497  | 1053829 | 1008333 | 1120834 | 1042348 | 1190272 | 1432314 | 1137117 | 916800  | 1394606 |  | 3057250 | 97      | 3056213 | 241     | 4106    | 262     |    |
| T          | 1164                | 14596  | 48118  | 90112   | 259795  | 548051  | 510035  | 509274  | 503658  | 485467  | 385543  | 516035  | 468579  | 486419  | 103396  |  | 4358    | 833     | 5772    | 103     | 360     | 576     |    |
| <b>PB1</b> |                     |        |        |         |         |         |         |         |         |         |         |         |         |         |         |  |         |         |         |         |         |         |    |
| A          | 165207              | 146591 | 607107 | 1027360 | 1786258 | 1757484 | 1134943 | 864487  | 1103671 | 891809  | 1155491 | 1039597 | 1206296 | 1277402 | 1940919 |  | 7560    | 1774    | 17880   | 5391700 | 5394367 | 5394220 |    |
| C          | 33444               | 153739 | 128837 | 496753  | 840891  | 1152777 | 1770044 | 2015569 | 1786427 | 1844808 | 1423703 | 1571602 | 1575591 | 1931770 | 1404741 |  | 1045    | 5394900 | 982     | 3498    | 971     | 1213    |    |
| G          | 29629               | 109982 | 194509 | 339320  | 821202  | 1061459 | 1220738 | 1370349 | 1241922 | 1321580 | 1255495 | 1544127 | 1449890 | 1110034 | 1707750 |  | 5379740 | 157     | 5376205 | 1159    | 1443    | 1338    |    |
| T          | 56707               | 78436  | 175436 | 336158  | 683216  | 1328104 | 1219490 | 1106466 | 1246215 | 1325181 | 1555979 | 1241890 | 1169544 | 1078015 | 343871  |  | 8936    | 1280    | 2214    | 324     | 500     | 510     |    |
| <b>PA</b>  |                     |        |        |         |         |         |         |         |         |         |         |         |         |         |         |  |         |         |         |         |         |         |    |
| A          | 37874               | 36700  | 212453 | 334702  | 263567  | 244529  | 189997  | 207956  | 161945  | 209885  | 174014  | 136773  | 97958   | 155668  | 664562  |  | 2310    | 155     | 1315278 | 1313766 | 1314659 | 1314988 |    |
| C          | 9246                | 26636  | 52173  | 135176  | 247906  | 279455  | 259500  | 305543  | 251793  | 339049  | 493392  | 375727  | 362402  | 825356  | 279306  |  | 78      | 1315629 | 173     | 753     | 620     | 595     |    |
| G          | 18523               | 23901  | 82771  | 187897  | 290840  | 301828  | 377876  | 252860  | 429741  | 429568  | 252916  | 483855  | 712104  | 115831  | 185252  |  | 1312991 | 140     | 322     | 1313    | 522     | 304     |    |
| T          | 4471                | 36461  | 47225  | 137309  | 218298  | 348219  | 353697  | 420875  | 366280  | 292029  | 372777  | 316884  | 142551  | 217962  | 186909  |  | 650     | 105     | 256     | 197     | 228     | 232     |    |
| <b>HA</b>  |                     |        |        |         |         |         |         |         |         |         |         |         |         |         |         |  |         |         |         |         |         |         |    |
| A          | 76444               | 120163 | 408742 | 642800  | 849507  | 742733  | 723245  | 623808  | 489089  | 447842  | 500611  | 390464  | 281935  | 531228  | 1326148 |  | 2376    | 35      | 3144900 | 3131381 | 3138859 | 3148836 |    |
| C          | 25230               | 40925  | 122013 | 332257  | 404559  | 536907  | 610673  | 560684  | 691058  | 908884  | 989766  | 704012  | 855042  | 1952610 | 531280  |  | 1000    | 3148785 | 717     | 8063    | 3311    | 247     |    |
| G          | 10306               | 47774  | 214784 | 307979  | 602259  | 730763  | 876371  | 919072  | 1080656 | 1044963 | 824533  | 1317298 | 1569825 | 236940  | 843267  |  | 3142984 | 48      | 2127    | 8045    | 5297    | 451     |    |
| T          | 21739               | 98686  | 87732  | 333010  | 590979  | 873991  | 689830  | 822002  | 715090  | 660565  | 790468  | 734914  | 439920  | 428817  | 448921  |  | 3254    | 746     | 1670    | 2125    | 2147    | 80      |    |
| <b>NP</b>  |                     |        |        |         |         |         |         |         |         |         |         |         |         |         |         |  |         |         |         |         |         |         |    |
| A          | 29141               | 69450  | 230915 | 397380  | 462177  | 459641  | 350636  | 291722  | 238885  | 204047  | 232351  | 198854  | 131284  | 228247  | 775808  |  | 2089    | 13      | 1561322 | 1559873 | 1559386 | 1561445 |    |
| C          | 1973                | 12312  | 42893  | 91595   | 180742  | 212927  | 239975  | 284267  | 269355  | 381011  | 526799  | 362032  | 318849  | 1005255 | 333080  |  | 250     | 20      | 1661153 | 40      | 418     | 408     | 30 |
| G          | 9933                | 35216  | 96615  | 243754  | 319942  | 448054  | 549287  | 514273  | 714554  | 730844  | 501420  | 785028  | 982398  | 149216  | 306335  |  | 1558582 | 20      | 287     | 1164    | 1836    | 159     |    |
| T          | 4866                | 17045  | 43720  | 111384  | 199714  | 286044  | 258029  | 320857  | 215675  | 169674  | 264360  | 207517  | 123673  | 176478  | 146436  |  | 736     | 473     | 10      | 204     | 29      | 25      |    |
| <b>NA</b>  |                     |        |        |         |         |         |         |         |         |         |         |         |         |         |         |  |         |         |         |         |         |         |    |
| A          | 102183              | 234851 | 669689 | 1428329 | 1465091 | 1281649 | 926296  | 731923  | 719661  | 718993  | 550529  | 485741  | 401042  | 537850  | 2473796 |  | 10859   | 2169    | 5079960 | 5081092 | 5078171 | 5077466 |    |
| C          | 23945               | 71441  | 264386 | 576378  | 789442  | 1110058 | 822914  | 1202350 | 1270683 | 1482489 | 1616477 | 1489821 | 1313111 | 3625400 | 1154702 |  | 1297    | 5080064 | 861     | 1404    | 1513    | 796     |    |
| G          | 15764               | 160896 | 351844 | 599334  | 1060309 | 1481549 | 1800330 | 1808390 | 1997272 | 2005727 | 1314159 | 1917314 | 2168715 | 2981148 | 447570  |  | 5072086 | 908     | 3028    | 1810    | 4035    | 6460    |    |
| T          | 17997               | 45812  | 232260 | 423496  | 863571  | 868770  | 1204095 | 1059610 | 865184  | 731577  | 923637  | 932059  | 383687  | 473968  | 448467  |  | 554     | 1655    | 947     | 490     | 1077    | 74      |    |
| <b>M</b>   |                     |        |        |         |         |         |         |         |         |         |         |         |         |         |         |  |         |         |         |         |         |         |    |
| A          | 46457               | 135414 | 330537 | 575800  | 711801  | 817277  | 557786  | 598429  | 431848  | 383429  | 451959  | 377331  | 305844  | 604263  | 1092470 |  | 5297    | 407     | 2552985 | 2551650 | 2549502 | 2553296 |    |
| C          | 8541                | 39148  | 76143  | 184699  | 365840  | 417924  | 495561  | 439977  | 521266  | 784798  | 855684  | 522339  | 668320  | 1335260 | 642747  |  | 330     | 2552952 | 74      | 864     | 2042    | 30      |    |
| G          | 34514               | 53036  | 161376 | 335263  | 494734  | 559965  | 756270  | 730552  | 941316  | 928060  | 841746  | 1211203 | 1335013 | 317732  | 570904  |  | 2547803 | 62      | 768     | 1010    | 1813    | 485     |    |
| T          | 8377                | 13377  | 113707 | 226518  | 384789  | 507970  | 567316  | 630976  | 540495  | 398596  | 586903  | 434172  | 293759  | 294170  | 247728  |  | 419     | 428     | 22      | 325     | 492     | 38      |    |
| <b>NS</b>  |                     |        |        |         |         |         |         |         |         |         |         |         |         |         |         |  |         |         |         |         |         |         |    |
| A          | 91277               | 266786 | 855007 | 1733888 | 1956312 | 1740772 | 1417973 | 1149297 | 964743  | 798235  | 886189  | 735760  | 475282  | 804253  | 3020035 |  | 16556   | 444     | 6081400 | 6071218 | 6071710 | 6080066 |    |
| C          | 26032               | 92774  | 184880 | 465828  | 808641  | 1013811 | 1050855 | 1384678 | 1188863 | 1580167 | 2353993 | 1430482 | 1257807 | 4212273 | 1209881 |  | 1771    | 6081195 | 96      | 2046    | 3945    | 1329    |    |
| G          | 66408               | 117285 | 349586 | 871814  | 1107674 | 1676265 | 1874249 | 1627548 | 2489189 | 2752653 | 1800246 | 2863522 | 3851041 | 477949  | 1244681 |  | 6053797 | 312     | 1448    | 6214    | 7211    | 804     |    |
| T          | 35635               | 67671  | 248222 | 523800  | 970313  | 1221852 | 1336897 | 1557191 | 1158851 | 823275  | 1174711 | 1039352 | 482934  | 587410  | 608455  |  | 10908   | 1081    | 88      | 1554    | 166     | 833     |    |

**Table S2:** Relative numbers of each nucleotide present at the 5' ends of viral mRNAs obtained from infected M-1 cells. The nucleotide positions (-15 to 7) are numbered according to the host/virus junction (vertical line), defined as the phosphodiester bond located upstream of position G2 on IAV mRNA.

| IAV mRNA   | Nucleotide position |        |        |         |         |         |         |         |         |         |         |         |         |         |         |  |         |         |         |         |         |         |
|------------|---------------------|--------|--------|---------|---------|---------|---------|---------|---------|---------|---------|---------|---------|---------|---------|--|---------|---------|---------|---------|---------|---------|
|            | -15                 | -14    | -13    | -12     | -11     | -10     | -9      | -8      | -7      | -6      | -5      | -4      | -3      | -2      | -1      |  | 2       | 3       | 4       | 5       | 6       | 7       |
| <b>PB2</b> |                     |        |        |         |         |         |         |         |         |         |         |         |         |         |         |  |         |         |         |         |         |         |
| A          | 26887               | 81677  | 196513 | 450431  | 956437  | 1197022 | 663242  | 714769  | 631678  | 530174  | 491465  | 498172  | 358634  | 874361  | 594305  |  | 5132    | 684     | 1973    | 3280298 | 3268244 | 3278325 |
| C          | 3419                | 25515  | 49389  | 146045  | 381175  | 595407  | 737431  | 646736  | 779621  | 750543  | 990685  | 774104  | 905145  | 1016421 | 1013293 |  | 537     | 3278884 | 2535    | 78      | 6407    | 1556    |
| G          | 7225                | 27052  | 135056 | 280438  | 528100  | 733488  | 1121682 | 1183931 | 1226992 | 1431459 | 1257505 | 1612425 | 1604358 | 969377  | 1565830 |  | 3268858 | 56      | 3268709 | 297     | 5776    | 215     |
| T          | 4815                | 14215  | 40551  | 119777  | 270864  | 550812  | 601295  | 580377  | 494454  | 499242  | 486518  | 382666  | 407916  | 420476  | 107322  |  | 6223    | 1126    | 7533    | 77      | 323     | 654     |
| <b>PB1</b> |                     |        |        |         |         |         |         |         |         |         |         |         |         |         |         |  |         |         |         |         |         |         |
| A          | 91812               | 289641 | 547378 | 1166986 | 1758050 | 1875985 | 1325495 | 1156329 | 1175589 | 1157927 | 1289375 | 1274160 | 1391811 | 1443596 | 2180196 |  | 8548    | 2933    | 24915   | 5863902 | 5869578 | 5870552 |
| C          | 12383               | 60407  | 236358 | 506078  | 1057071 | 1420388 | 1784297 | 1893767 | 1936178 | 1846372 | 1746898 | 1455389 | 1805050 | 2077721 | 1472346 |  | 7854    | 5868540 | 418     | 1716    | 1165    | 1271    |
| G          | 19503               | 65877  | 196276 | 336328  | 760796  | 1097174 | 1248907 | 1493665 | 1560158 | 1473824 | 1396263 | 1683915 | 1627194 | 1326311 | 1843137 |  | 5849522 | 150     | 5846052 | 6623    | 2025    | 1288    |
| T          | 14899               | 37119  | 117255 | 299936  | 651196  | 1306567 | 1423333 | 1243339 | 1137212 | 1340041 | 1401600 | 1435384 | 1024991 | 1004896 | 377489  |  | 7444    | 1545    | 1383    | 1027    | 400     | 57      |
| <b>PA</b>  |                     |        |        |         |         |         |         |         |         |         |         |         |         |         |         |  |         |         |         |         |         |         |
| A          | 55009               | 181124 | 575522 | 1154497 | 1219427 | 1530309 | 1142641 | 986105  | 737003  | 642988  | 658298  | 644582  | 595493  | 785219  | 2543381 |  | 11899   | 885     | 5158005 | 5139917 | 5154845 | 5155115 |
| C          | 9132                | 62716  | 184331 | 482379  | 727791  | 710653  | 989141  | 948974  | 895095  | 1211189 | 1722068 | 1412392 | 1411290 | 3158964 | 939482  |  | 442     | 5154471 | 897     | 8037    | 2683    | 4599    |
| G          | 33165               | 54974  | 296205 | 482409  | 823142  | 1142961 | 1377890 | 1411280 | 1993072 | 2023641 | 1258572 | 1900913 | 2661703 | 4561200 | 992932  |  | 5145548 | 1162    | 1395    | 12743   | 1932    | 1031    |
| T          | 17075               | 39272  | 102406 | 403097  | 852445  | 1058207 | 1017211 | 1206198 | 1049224 | 946188  | 1314933 | 1132747 | 466556  | 742005  | 685784  |  | 3690    | 5061    | 1282    | 882     | 2119    | 834     |
| <b>HA</b>  |                     |        |        |         |         |         |         |         |         |         |         |         |         |         |         |  |         |         |         |         |         |         |
| A          | 33875               | 123703 | 331546 | 778178  | 1021900 | 1040344 | 834647  | 683714  | 618861  | 607170  | 608137  | 480650  | 367615  | 621744  | 1450127 |  | 5802    | 104     | 3703714 | 3702078 | 3693904 | 3710344 |
| C          | 10326               | 36678  | 123359 | 241407  | 480136  | 617043  | 554428  | 799749  | 755817  | 926755  | 1243625 | 740544  | 947103  | 2332163 | 747052  |  | 260     | 3710455 | 300     | 2108    | 4436    | 338     |
| G          | 18548               | 41150  | 161255 | 402040  | 544787  | 873317  | 1044729 | 1035625 | 1390034 | 1438781 | 1044603 | 1795634 | 2044492 | 366060  | 1102185 |  | 3703928 | 218     | 5797    | 6290    | 9122    | 484     |
| T          | 8982                | 42732  | 132394 | 266595  | 561270  | 778190  | 902503  | 833294  | 643894  | 553062  | 715243  | 678485  | 343048  | 367315  | 411846  |  | 1220    | 433     | 1399    | 734     | 3748    | 44      |
| <b>NP</b>  |                     |        |        |         |         |         |         |         |         |         |         |         |         |         |         |  |         |         |         |         |         |         |
| A          | 82600               | 271967 | 901    |         |         |         |         |         |         |         |         |         |         |         |         |  |         |         |         |         |         |         |

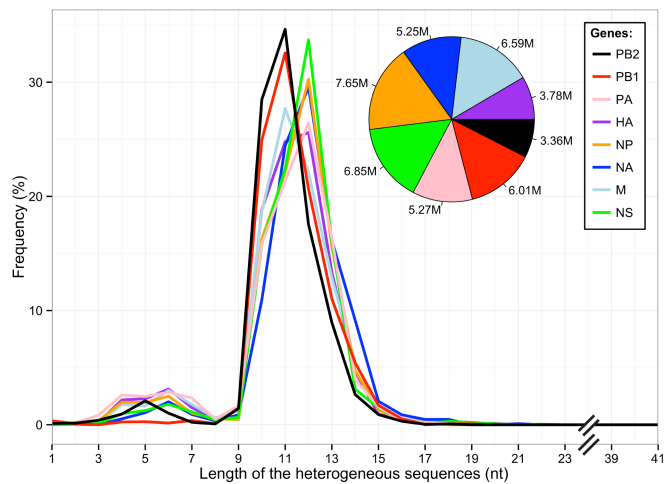

**Figure S1: Length distribution of the heterogeneous sequences obtained from infected M-1 cells.** All sequences representing each of the eight IAV transcripts isolated from infected M-1 cells and located between the ligated RACE primer and position G2 on IAV mRNA are included. Inset: proportion of IAV sequences corresponding to each transcript obtained following high-throughput sequencing.

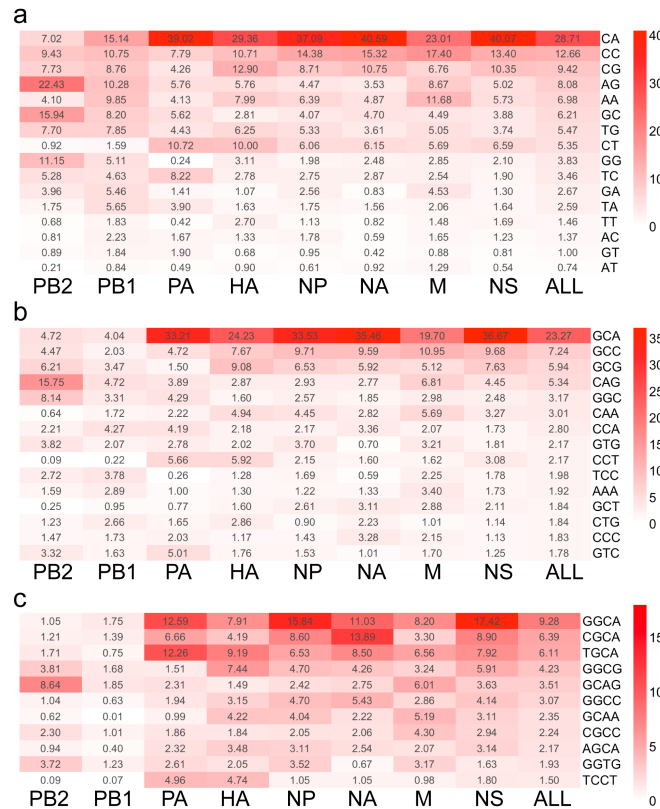

**Figure S2: Analysis of the nucleotide motifs present at the 3' ends of the heterogeneous sequences of viral mRNAs in human cells.** A heatmap is shown to compare the frequencies (%) of all possible dinucleotide (a), and trinucleotide (b) and tetranucleotide (c) motifs found at the 3' ends of the heterogeneous sequences used by each IAV mRNA. For (b) and (c), only the motifs which were found ~5% or more of the time by at least one of the transcripts are presented. All motifs are represented in the 5' to 3' orientation.

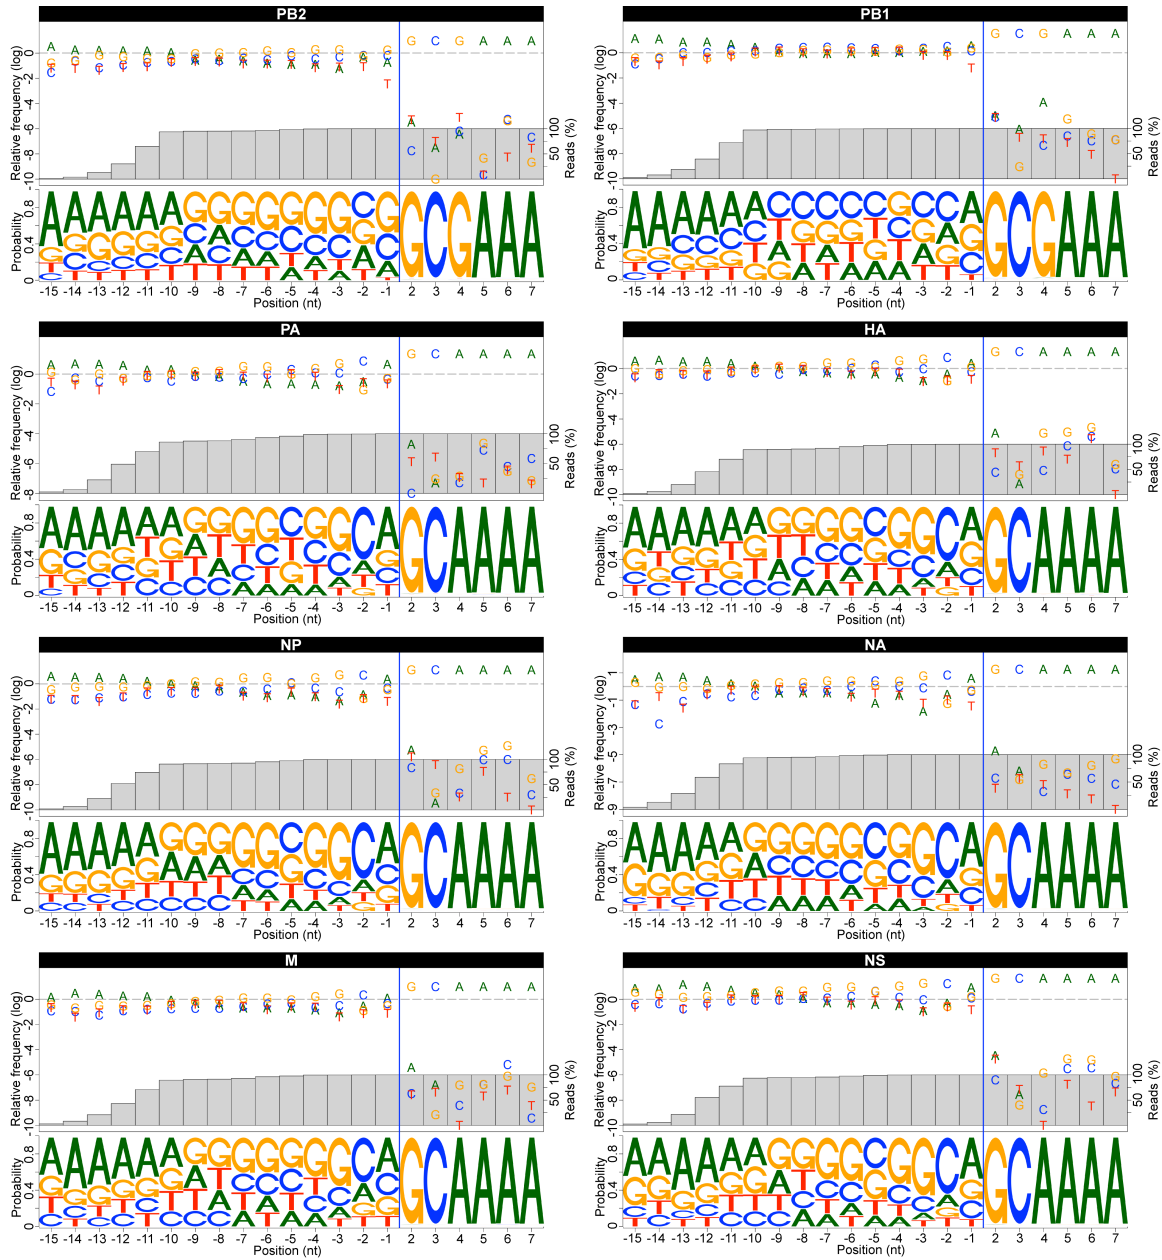

**Figure S3: Sequence variation present in the heterogeneous sequences located at the 5'-end of viral mRNAs obtained from infected M-1 cells.** For each transcript, the top panel shows the relative nucleotide frequency at each position (log scaled), and the bottom panel shows the Logo representation of the nucleotide variation. The nucleotides are numbered according to the host/virus junction (blue line), defined as the phosphodiester bond located upstream of position G2 on IAV mRNA. The grey bars represent the percentage of the population of reads included in the calculation. Only sequence reads that appeared at least twice were used in the analysis. For all IAV mRNA, only nucleotide frequencies observed from 15 nt upstream of the G2 and up to 5 nt downstream of G2 are represented. All motifs are represented in the 5' to 3' orientation.

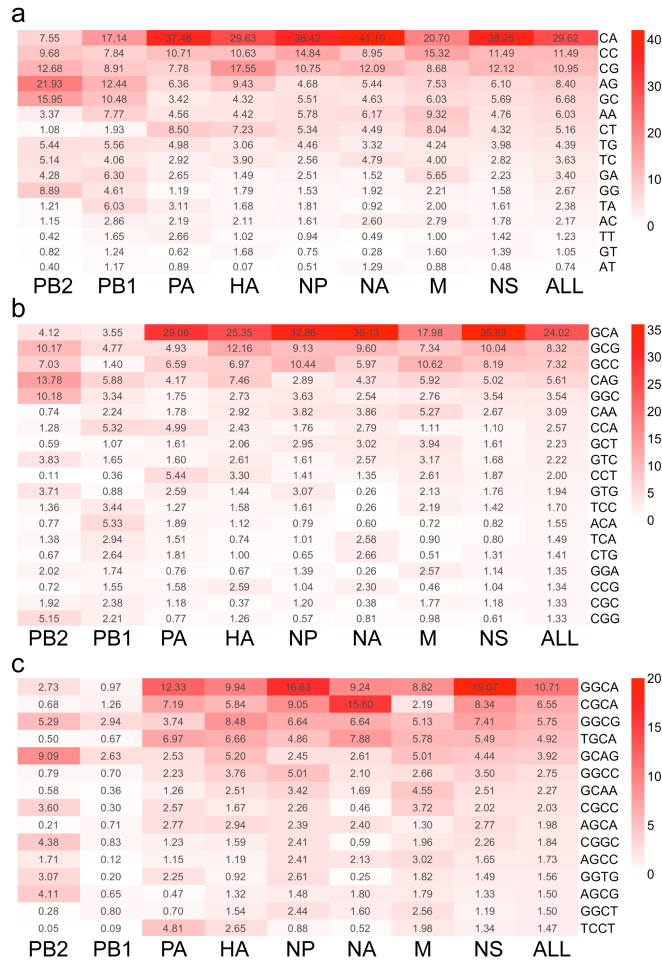

**Figure S4: Analysis of the nucleotide motifs present at the 3' ends of the heterogeneous sequences of IAV mRNAs in mouse cells.** A heatmap is shown to compare the frequencies (%) of all possible dinucleotide (a), and trinucleotide (b) and tetranucleotide (c) motifs found at the 3' ends of the heterogeneous sequences used by each IAV mRNA. For (b) and (c), only the motifs which were found ~5% or more of the time by at least one of the transcripts are presented. All motifs are represented in the 5' to 3' orientation.

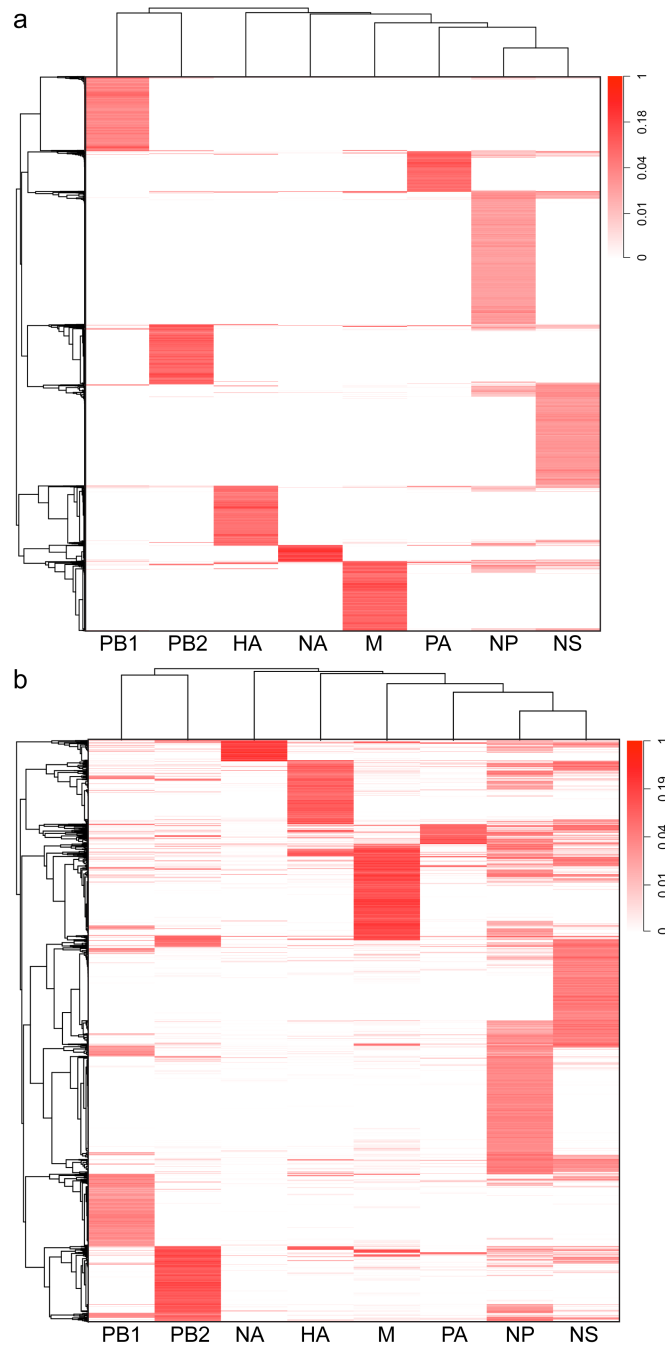

**Figure S5: Mouse sequences/genes used by the eight viral transcripts.** (a) Heatmap representation showing the distribution of the heterogeneous sequences (vertical axis) associated with each IAV transcript. (b) Heatmap representation showing the distribution of the host genes (vertical axis) potentially used by each IAV transcript. The heterogeneous sequences/host genes are hierarchically clustered. Data in each column have been normalized to the maximum value in that column. To simplify the representation, only sequences/genes that appears at least 1000 times were used.

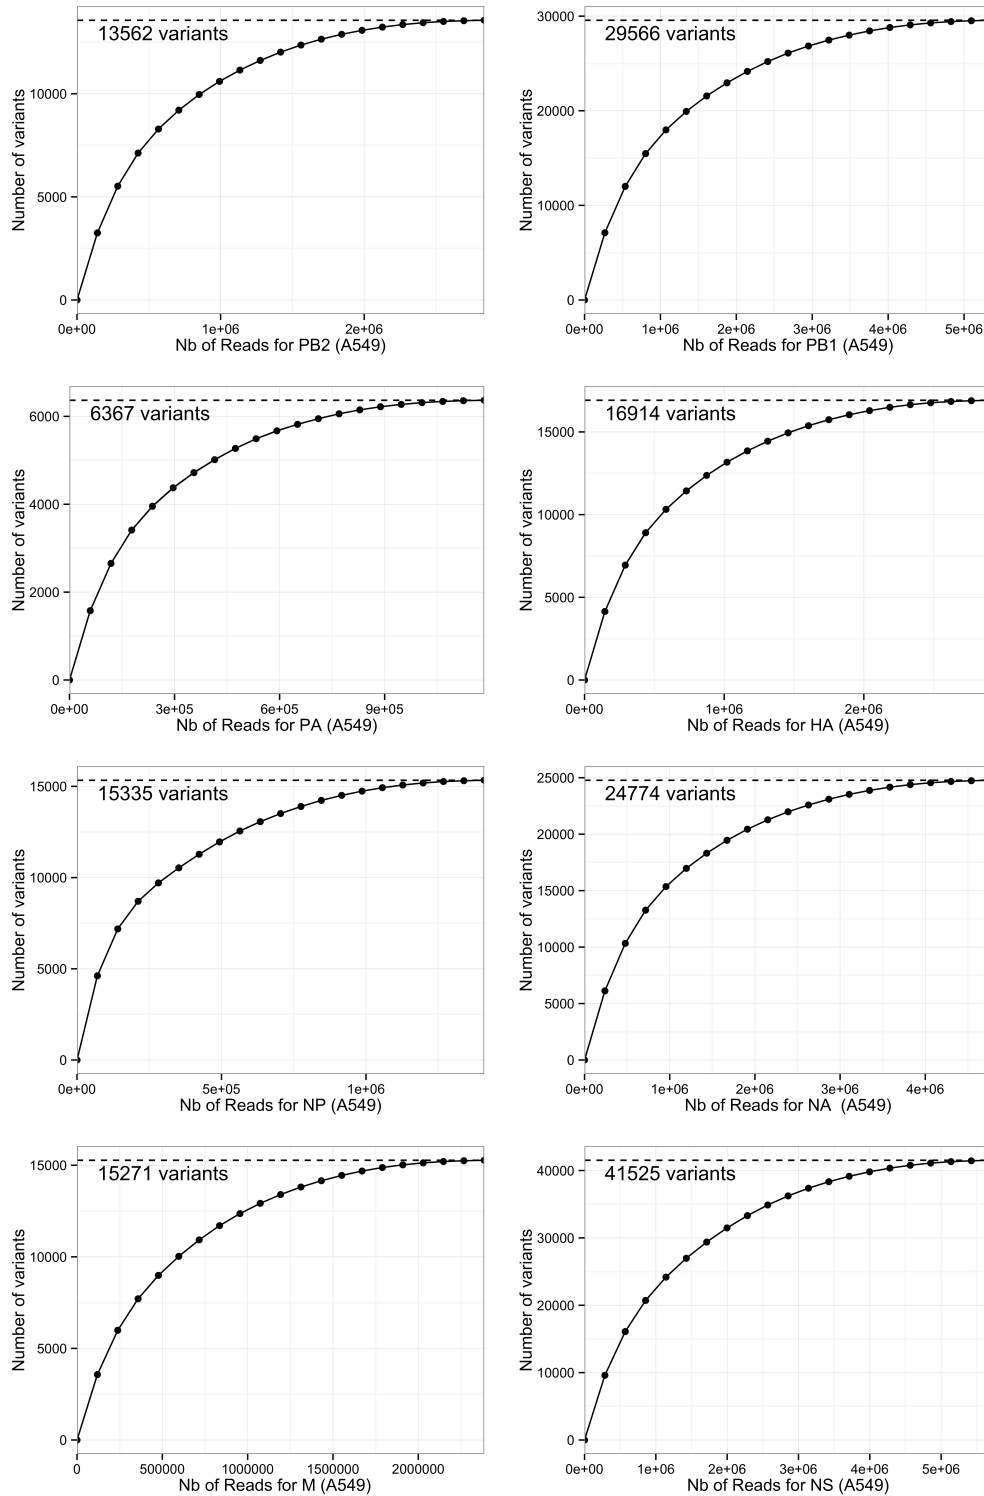

**Figure S6: Rarefaction curves of the human heterogeneous sequences associated with each viral transcript.** The number of unique heterogeneous sequence variants is plotted as a function of the number of reads obtained from IAV-infected human (A549) cells. Only sequence reads that appeared at least twice were used in the analysis.



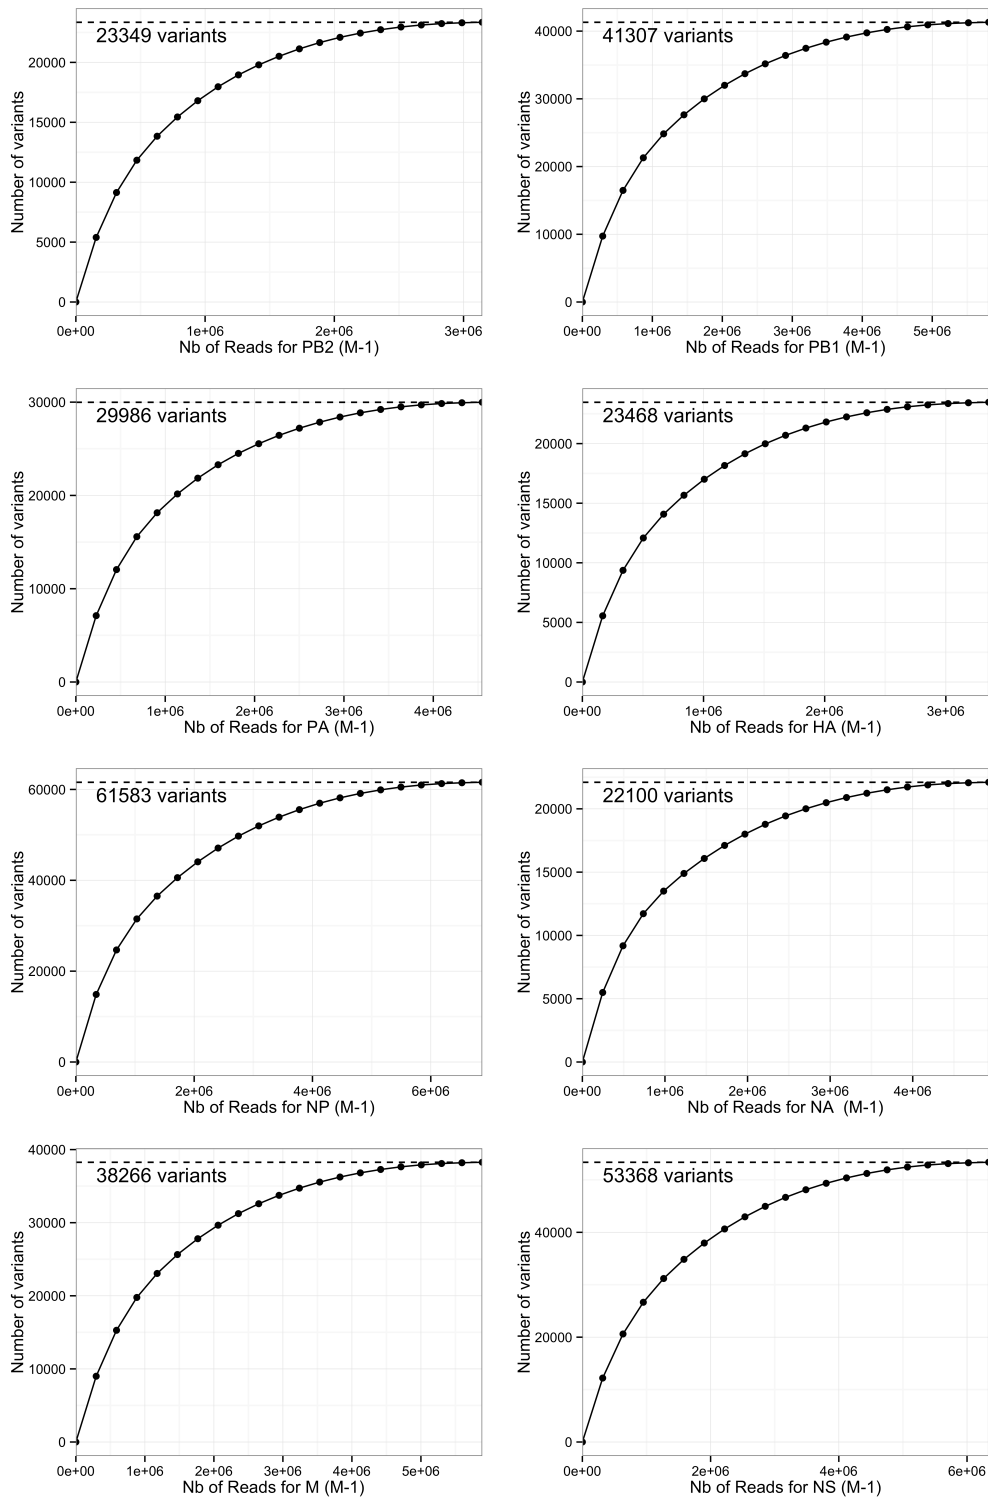

**Figure S7: Rarefaction curves of the mouse heterogeneous sequences associated with each viral transcript.** The number of unique heterogeneous sequence variants is plotted as a function of the number of reads obtained from IAV-infected mouse (M-1) cells. Only sequence reads that appeared at least twice were used in the analysis.

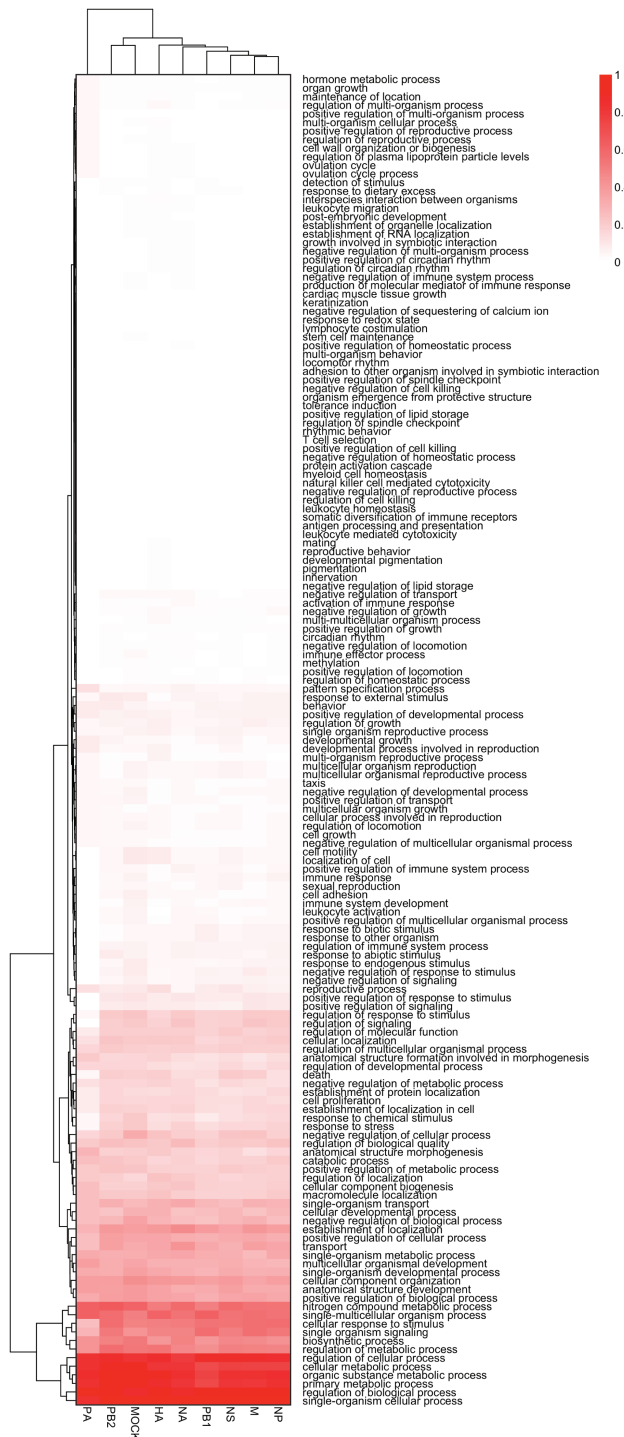

**Figure S8: Enrichment of Gene Ontology (GO) term corresponding to the genes targeted by influenza A/HongKong/1/1968 (H3N2) virus cap-snatching in mouse cells.** Data are presented as level 3 GO categorization for biological process. Data in each column have been normalized to the maximum value in that column. To account for bias due to the gene set we used, mRNA expression profile of mock infected cells (i.e. “MOCK”) was used for the GO terms enrichment analysis.

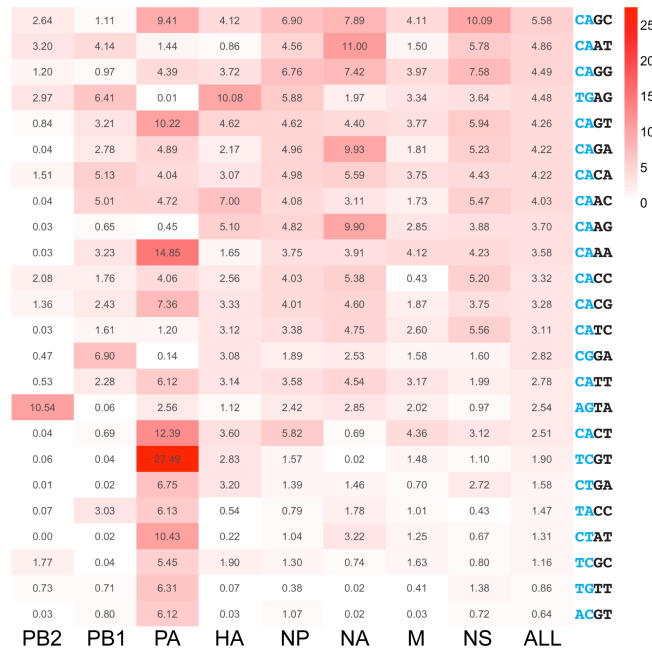

**Figure S9: Analysis of nucleotide sequences enriched at the cleavage site of human pre-mRNA.** Heatmap representation of the frequencies (%) of tetranucleotide motifs composed of the last two nucleotides of the heterogeneous sequences (blue) and the next two nucleotides of the host pre-mRNA (black). The “ALL” dataset represents the sum of all the others dataset. All motifs are represented in the 5’ to 3’ orientation.

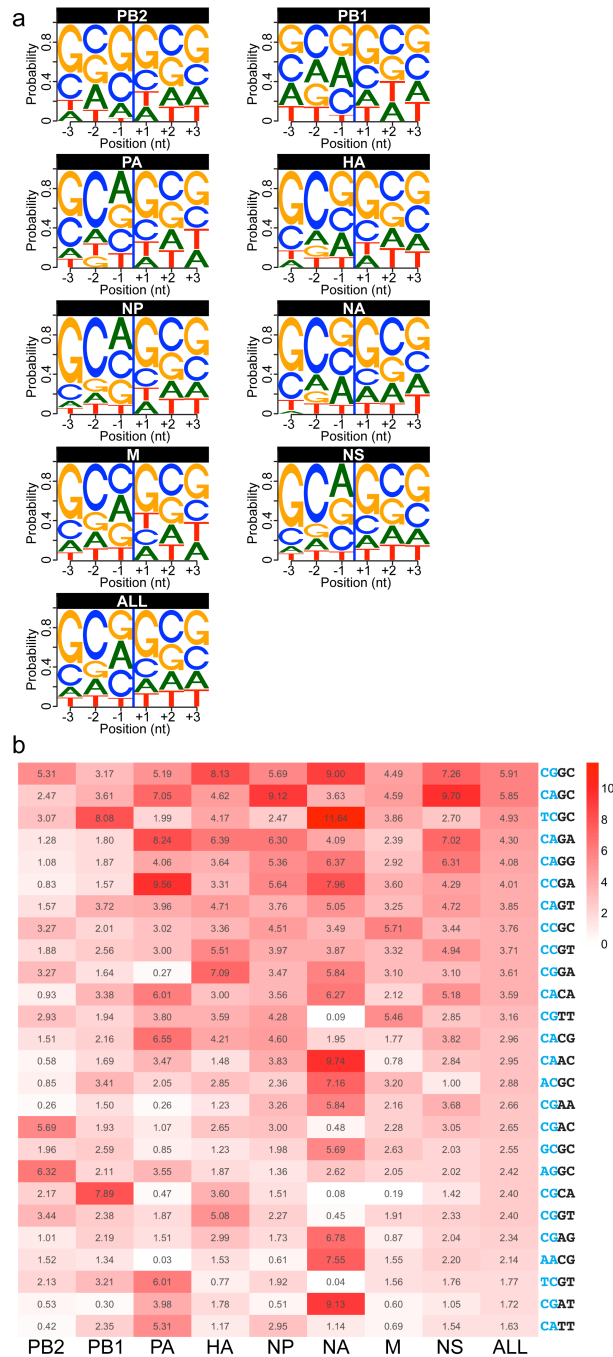

**Figure S10: Analysis of nucleotide sequences enriched at the cleavage site in targeted mouse pre-mRNAs. (a)** Logo representation of the last three nucleotides of the heterogeneous sequence and the next three nucleotides found in the host pre-mRNA downstream of the heterogeneous sequences. The nucleotides are numbered according to the heterogeneous sequences/pre-mRNA junction (blue line). **(b)** Heatmap representation of the frequencies (%) of tetranucleotide motifs composed of the last two nucleotides of the heterogeneous sequences (blue) and the next two nucleotides of the host pre-mRNA (black). The “ALL” dataset represents the sum of all the individual datasets. All motifs are represented in the 5’ to 3’ orientation.
